# Supplementary material for: Discovering protein–DNA binding sequence patterns using association rule mining
Source: PubMed Central journal article supplement — Nucleic Acids Res. 2010 Jun 6;38(19):6324–37. doi: 10.1093/nar/gkq500 (PMC2965231; doi:10.1093/nar/gkq500), 2010-06-06
Supplement: supp_gkq500_nar-00482-n-2010-File001.pdf [file supp_gkq500_nar-00482-n-2010-File001.pdf]

Table 20. Maximal TFBS Binding Prediction Score over 50 runs. Each block denotes the maximal performance of TFBS Binding Prediction Score of the pairs over 50 random runs under different settings. The first row denotes the different settings for the value of k, whereas the first column denotes the minimal confidence (confidence level).

Table with 10 columns: Confidence, TFBS4mer-TF4mer, TFBS4mer-TF5mer, TFBS4mer-TF6mer, TFBS5mer-TF4mer, TFBS5mer-TF5mer, TFBS5mer-TF6mer, TFBS6mer-TF4mer, TFBS6mer-TF5mer, TFBS6mer-TF6mer. Rows range from Confidence 0.0 to 1.0.

Table 21. Maximal Binding Prediction Score over 50 runs. Each block denotes the maximal performance of Binding Prediction Score of the pairs over 50 random runs under different settings. The first row denotes the different settings for the value of k, whereas the first column denotes the minimal confidence (confidence level).

Table with 10 columns: Confidence, TFBS4mer-TF4mer, TFBS4mer-TF5mer, TFBS4mer-TF6mer, TFBS5mer-TF4mer, TFBS5mer-TF5mer, TFBS5mer-TF6mer, TFBS6mer-TF4mer, TFBS6mer-TF5mer, TFBS6mer-TF6mer. Rows range from Confidence 0.0 to 1.0.

Table 22. Maximal TFBS Prediction Score over 50 runs (Merged Pairs). Each block denotes the maximal performance of TFBS Prediction Score of the merged pairs over 50 random runs under different settings. The first row denotes the different settings for the value of k, whereas the first column denotes the minimal confidence (confidence level).

Table with 10 columns: Confidence, TFBS4mer-TF4mer, TFBS4mer-TF5mer, TFBS4mer-TF6mer, TFBS5mer-TF4mer, TFBS5mer-TF5mer, TFBS5mer-TF6mer, TFBS6mer-TF4mer, TFBS6mer-TF5mer, TFBS6mer-TF6mer. Rows range from Confidence 0.0 to 1.0.

Table 23. Maximal TFBS Binding Prediction Score over 50 runs (Merged Pairs). Each block denotes the maximal performance of TFBS Binding Prediction Score of the merged pairs over 50 random runs under different settings. The first row denotes the different settings for the value of k, whereas the first column denotes the minimal confidence (confidence level).

Table with 10 columns: Confidence, TFBS4mer-TF4mer, TFBS4mer-TF5mer, TFBS4mer-TF6mer, TFBS5mer-TF4mer, TFBS5mer-TF5mer, TFBS5mer-TF6mer, TFBS6mer-TF4mer, TFBS6mer-TF5mer, TFBS6mer-TF6mer. Rows range from Confidence 0.0 to 1.0.

Table 24. Maximal Binding Prediction Score over 50 runs (Merged Pairs). Each block denotes the maximal performance of Binding Prediction Score of the merged pairs over 50 random runs under different settings. The first row denotes the different settings for the value of k, whereas the first column denotes the minimal confidence (confidence level).

Table with 10 columns: Confidence, TFBS4mer-TF4mer, TFBS4mer-TF5mer, TFBS4mer-TF6mer, TFBS5mer-TF4mer, TFBS5mer-TF5mer, TFBS5mer-TF6mer, TFBS6mer-TF4mer, TFBS6mer-TF5mer, TFBS6mer-TF6mer. Rows range from Confidence 0.0 to 1.0.
